# Supplementary material for: Interfacial synthesis of magnetic PMMA@Fe3O4/Cu3(BTC)2 hollow microspheres through one-pot Pickering emulsion and their application as drug delivery
Source: Royal Society of Chemistry journal article supplement (doi:10.1039/c6ra11077k), 2016-01-01
Supplement: c6ra11077k1.pdf [file c6ra11077k1.pdf]

## Supporting Information

### **Interfacial Synthesis of Magnetic PMMA@Fe<sub>3</sub>O<sub>4</sub>/ Cu<sub>3</sub>(BTC)<sub>2</sub> Hollow Microspheres through One-Pot Pickering Emulsion and Their Application as Drug Delivery**

Xiaomin Zhu,<sup>a</sup> Shenping Zhang,<sup>a</sup> Lihuo Zhang,<sup>a</sup> Honglai Liu<sup>a</sup> and Jun Hu\*<sup>a</sup>

<sup>a</sup>Key Laboratory for Advanced Materials, East China University of Science and Technology, 130  
Meilong Road, Shanghai 200237, China. E-mail: junhu@ecust.edu.cn; Fax: 86-21-64252195; Tel:

86-21-64252195

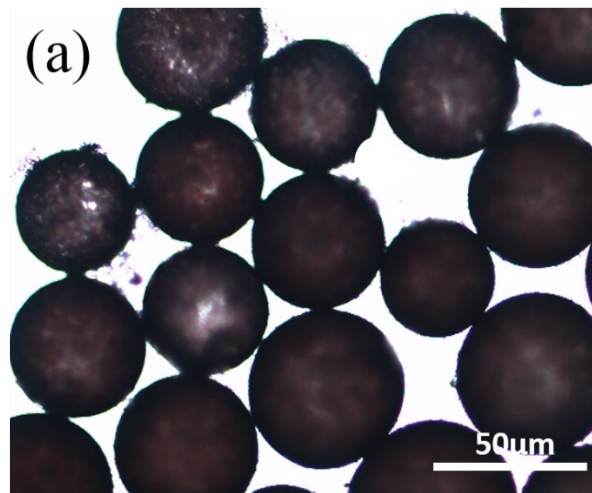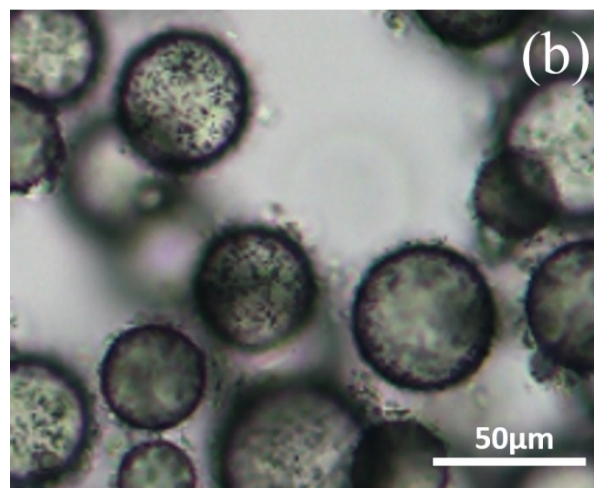

**Figure S1** Optical micrographs of Pickering emulsion stabilized by  $\text{Fe}_3\text{O}_4$  nanoparticles (a) No precursors of  $\text{Cu}_3(\text{BTC})_2$ ; (b) Containing precursors of  $\text{Cu}_3(\text{BTC})_2$

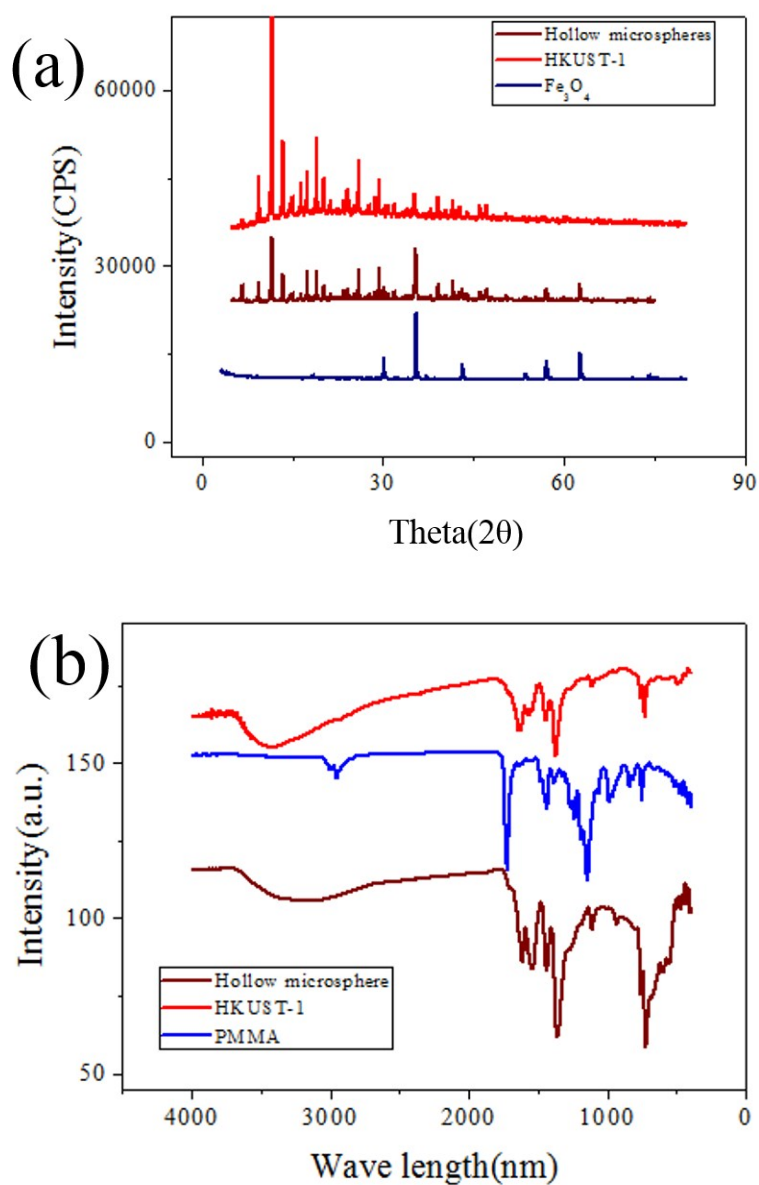

**Figure S2** (a): PXRD patterns Fe<sub>3</sub>O<sub>4</sub> NPs, Cu<sub>3</sub>(BTC)<sub>2</sub> and the powder of the magnetic hollow Fe<sub>3</sub>O<sub>4</sub>/ Cu<sub>3</sub>(BTC)<sub>2</sub> composite.(b): FTIR spectra of PMMA, Cu<sub>3</sub>(BTC)<sub>2</sub> and magnetic hollow PMMA@Fe<sub>3</sub>O<sub>4</sub>/Cu<sub>3</sub>(BTC)<sub>2</sub> hybrid microspheres

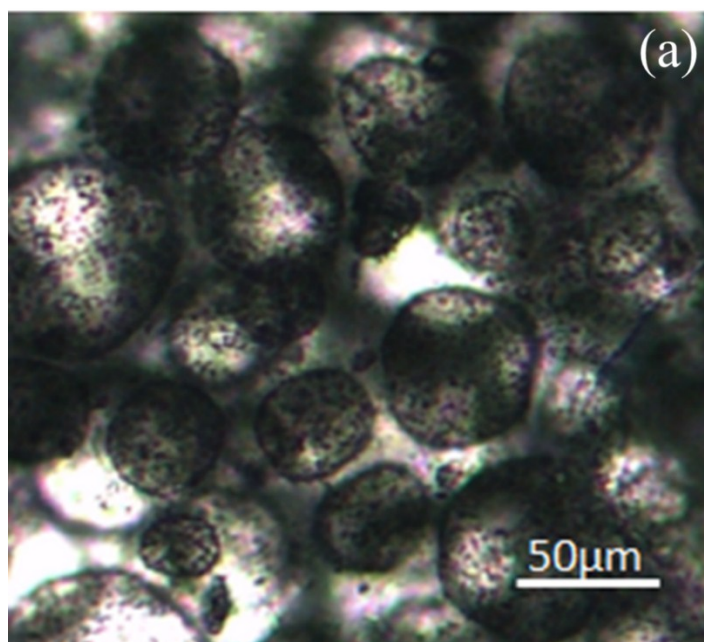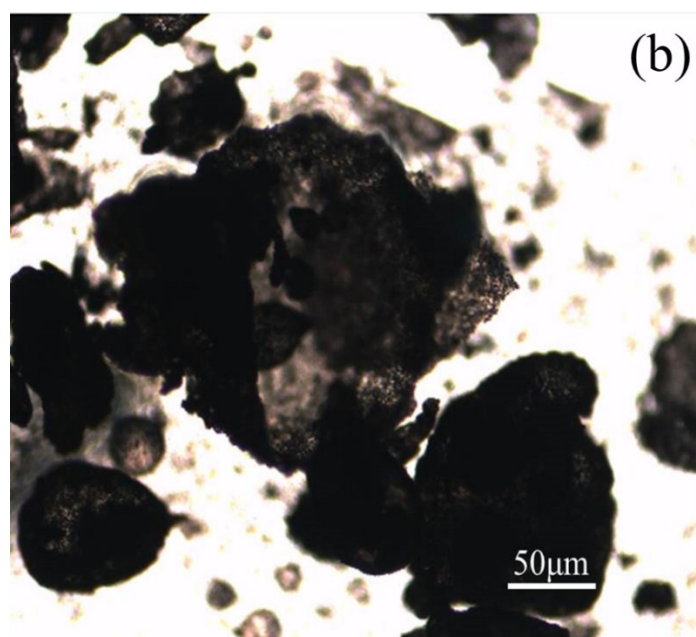

**Figure S3** OM images of (a) dried magnetic hollow  $\text{Fe}_3\text{O}_4/\text{Cu}_3(\text{BTC})_2$  composite microspheres (b) non-spheres of  $\text{PMMA}@\text{Fe}_3\text{O}_4$  hybrids

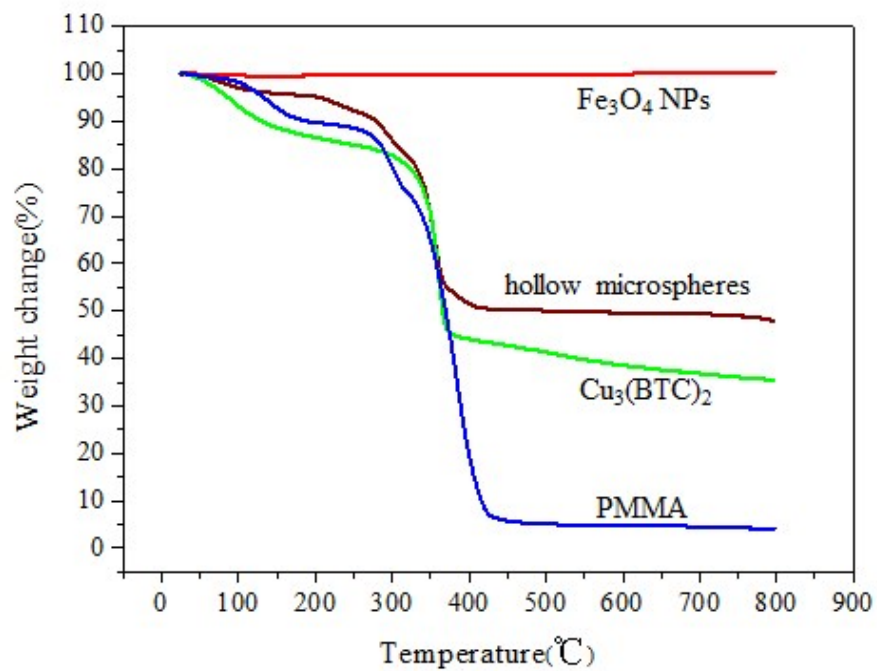

**Figure S4** TGA curves of the Fe<sub>3</sub>O<sub>4</sub> NPs, Cu<sub>3</sub>(BTC)<sub>2</sub>, PMMA and hollow PMMA@Fe<sub>3</sub>O<sub>4</sub>/Cu<sub>3</sub>(BTC)<sub>2</sub> hybrid microspheres.

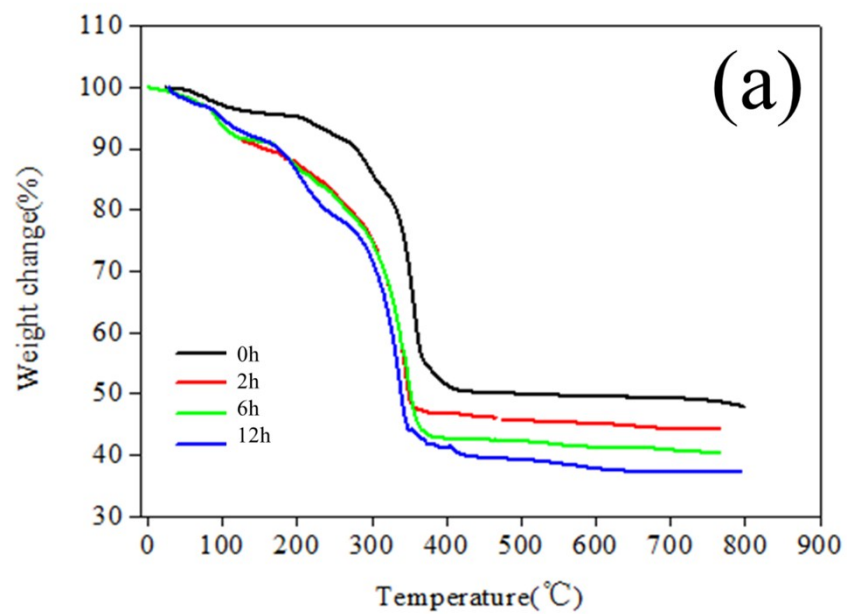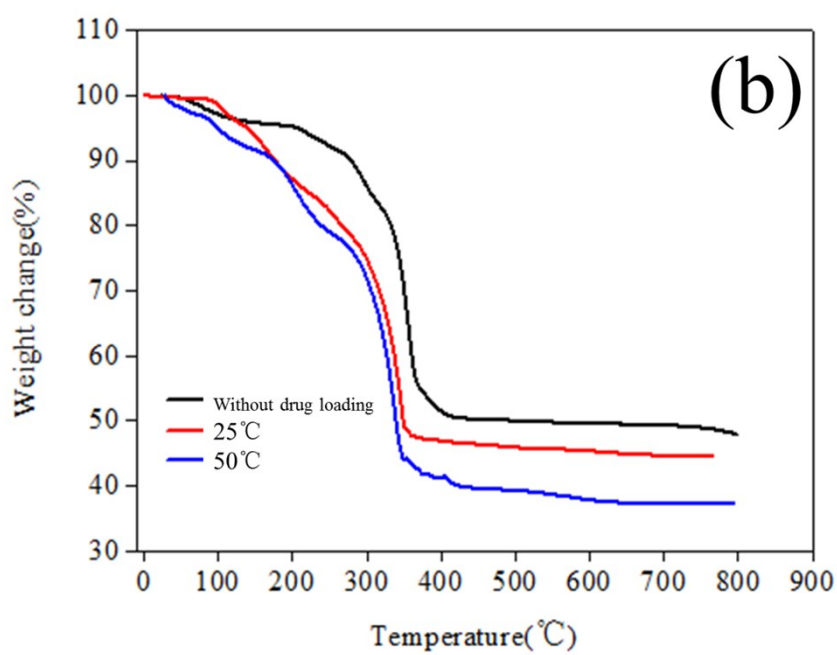

**Figure S5** (a) The changes of drug loading performance with the time at 50 °C. (b) The changes of drug loading performance with the temperature for 12 h.

**Table S1** The loading capacity and release time of different materials for ibuprofen

| Sample                                      | Loading capacity | Release time |
|---------------------------------------------|------------------|--------------|
| Microporous Silica <sup>[1]</sup>           | 150-200 mg/g     | 1-7 h        |
| Mesoporous Carbons <sup>[2]</sup>           | 200-240 mg/g     | 0.8-5 h      |
| SBA-15 <sup>[3]</sup>                       | 210 mg/g         | 4-7 h        |
| Natural Halloysite Nanotubes <sup>[4]</sup> | 120-170 mg/g     | --           |
| MIL-53 <sup>[5]</sup>                       | 280 mg/g         | --           |
| This Work                                   | 250 mg/g         | 7-15 h       |

## Reference

- [1] T. Numpilai, S. Muenmee and T. Witoon, *Mat Sci Eng C-Mater*, 2016, **59**, 43–52.
- [2] X.F. Wang, P. Liu, Y. Tian, *Microporous Mesoporous Mater*, 2011, **142**, 334–340.
- [3] F. Rehman, P. L.O. Volpe, C. Airoidi, *Colloids Surf B Biointerfaces*, 2014, **119**, 82–89.
- [4] D. Y. Tan , P. Yuan , F. A. Bergaya , H. guang , D. Liu , H. M. Liu and H. P. He, *Microporous Mesoporous Mater*, 2013, **179**, 89–98.
- [5] P. Horcajada, T. Chalati, C. Serre, B. Gillet, C. Sebrie, T. Baati, J. F. Eubank, D. Heurtaux, P. Clayette, C. Kreuz, J.S. Chang, Y. K. Hwang, V. Marsaud, P.N. Bories, L. Cynober, S. Gil, G. Ferey, P. Couvreur and R. Gref, *Nat. Mater*, 2010, **9**, 172.
